# Supplementary material
Source: PubMed Central journal article supplement (PMC5368593)
Supplement: mmc1.pdf [file mmc1.pdf]

**YMTHE, Volume 25**

## **Supplemental Information**

**Adoptive Transfer of mRNA-Transfected T Cells**

**Redirected against Diabetogenic CD8 T Cells**

**Can Prevent Diabetes**

**Sigal Fishman, Mark D. Lewis, L. Khai Siew, Evy De Leenheer, Dimitri Kakabadse, Joanne Davies, Doron Ziv, Alon Margalit, Nathan Karin, Gideon Gross, and F. Susan Wong**

## Legend for supplementary figure S1.

### S1 Gating strategy for cytotoxicity assay

a. NOD T cells were electroporated with InsB<sub>15-23</sub>/β<sub>2</sub>m/CD3-ζ mRNA (top row) or electroporated without RNA (second row) and were incubated with PKH26-labeled target CHIB2 hybridoma cells, at an effector:target E:T ratio of 10:1 for 24 hours. PKH26-labeled target cells alone are shown in the bottom row. The analysis was performed by flow cytometry, detecting cells damaged by cytotoxicity, with TOPRO-3 added just prior to analysis. The gating strategy is shown. Total cells were gated and then after gating for single cells, the populations that were labeled with PKH26 and those stained by TOPRO-3 are shown in the middle panel. The % killed cells are shown in the right panels with cells stained with TOPRO3 calculated as a percentage of total PKH26-labeled target cells.

b. NOD T cells were electroporated with InsB<sub>15-23</sub>/β<sub>2</sub>m/CD3-ζ mRNA (top row) or electroporated without RNA (second row) and were incubated with PKH26-labeled target G9 insulin-reactive CD8 T cells at an effector:target E:T ratio of 5:1 for 24 hours. PKH26-labeled target cells alone are shown in the bottom row. The analysis was performed by flow cytometry, detecting cells damaged by cytotoxicity, with TOPRO-3 added just prior to analysis. The gating strategy is shown. Total cells were gated and then, after gating for single cells, the populations that were labeled with PKH26 and those stained by TOPRO-3 are shown in the middle panel. The % killed cells are shown in the right panels with cells stained with TOPRO3 calculated as a percentage of total PKH26-labeled target cells.

S1

a.

NOD with insRNA  
+CHIB2  
E:T 10:1

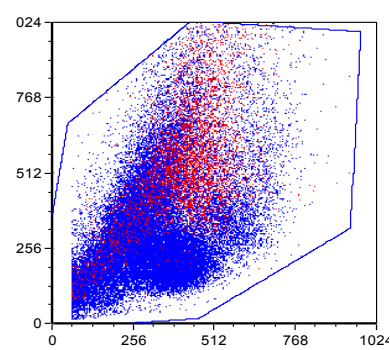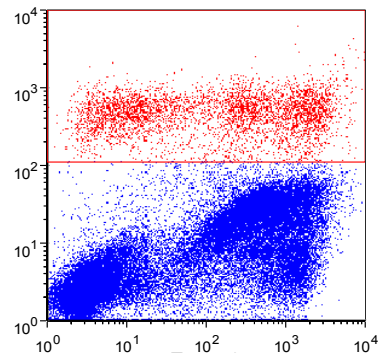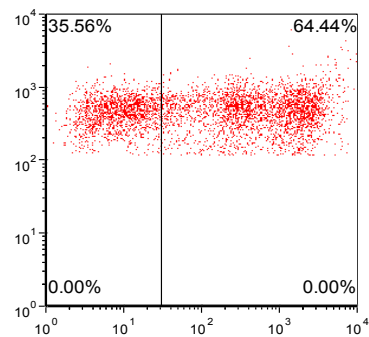

NOD noRNA  
+CHIB2  
E:T 10:1

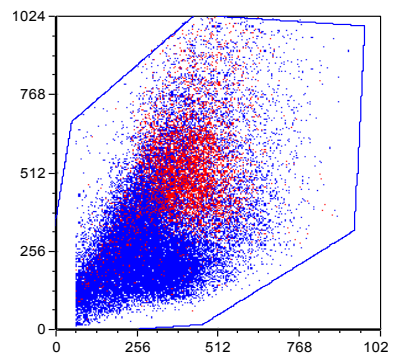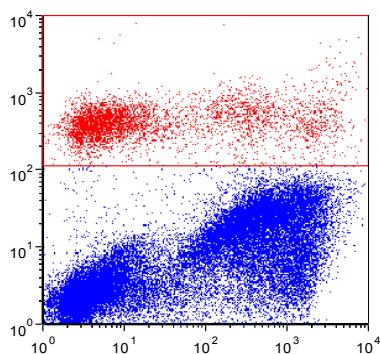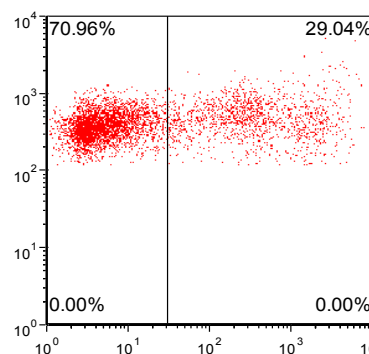

Target CHIB2  
only

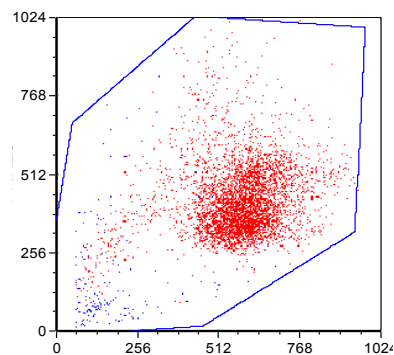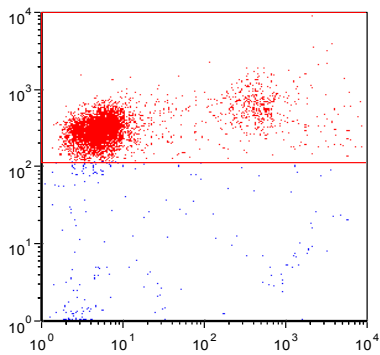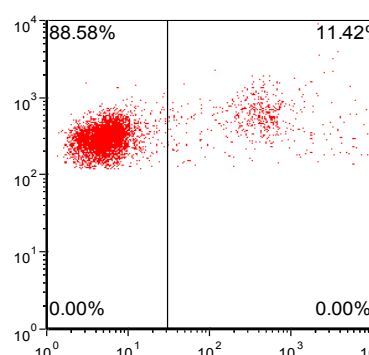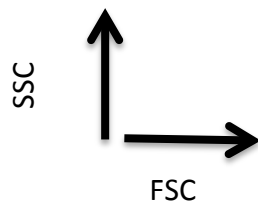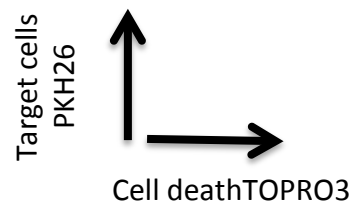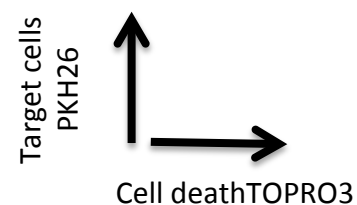

b.

NOD with insRNA  
+G9 E:T 5:1

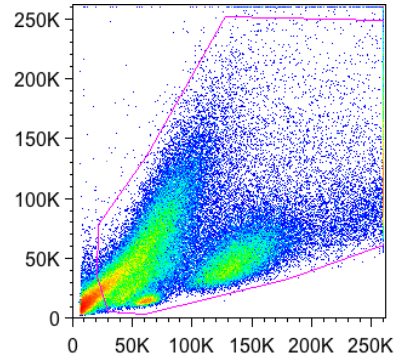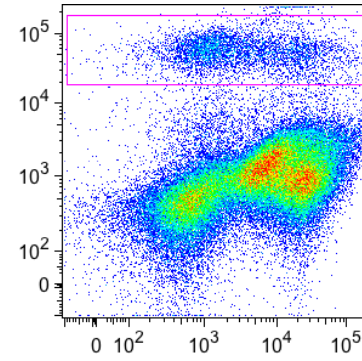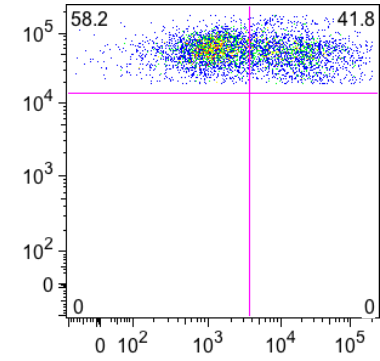

NOD no RNA  
+G9 E:T 5:1

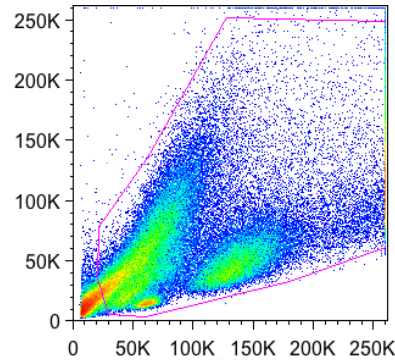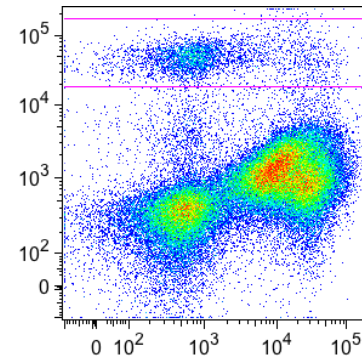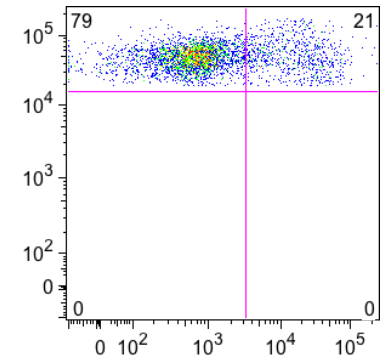

Target G9 only

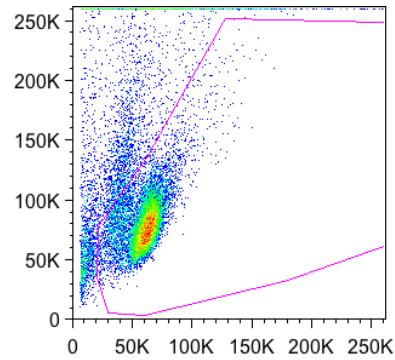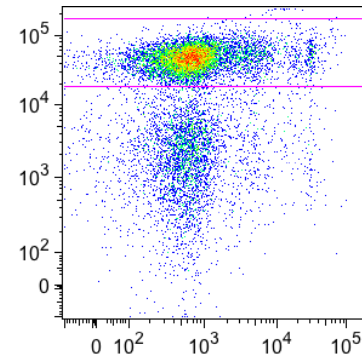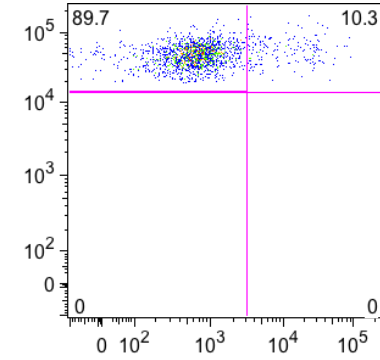

SSC  
↑  
FSC  
→

Target cells  
PKH26  
↑  
Cell death TOPRO3  
→

Target cells  
PKH26  
↑  
Cell death TOPRO3  
→
